1 **Neuropsychological evidence of multi-domain network hubs in the human thalamus**

2

3 **Authors:** Kai Hwang<sup>1,2,3</sup>, James M. Shine<sup>4</sup>, Joel Bruss<sup>5</sup>, Daniel Tranel<sup>1,2,5</sup>, Aaron D.

4 Boes<sup>2,3,5,6</sup>

5

6 **Affiliations:** <sup>1</sup>Department of Psychological and Brain Sciences, <sup>2</sup>Iowa Neuroscience  
7 Institute, <sup>3</sup>Department of Psychiatry, The University of Iowa & The University of Iowa  
8 College of Medicine; <sup>4</sup>Brain and Mind Center, The University of Sydney; <sup>5</sup>Department of  
9 Neurology, <sup>6</sup>Department of Pediatrics, The University of Iowa & The University of Iowa  
10 College of Medicine

11

12 **Corresponding Author:**

13 Kai Hwang, Ph.D.  
14 Department of Psychological and Brain Sciences  
15 The University of Iowa  
16 G60 PBSB  
17 340 Iowa Ave  
18 Iowa City, IA 52245  
19 [kai-hwang@uiowa.edu](mailto:kai-hwang@uiowa.edu)

20

21

22 **Acknowledgments:** K.H. was supported by National Institutes of Health  
23 R01MH122613. J.M.S was supported by National Health and Medical Research Council  
24 GNT1156536 and National Institutes of Health RO1MH117772. D.T. was supported by  
25 National Institutes of Health P50 MH094258 and the Kiwanis Neuroscience Research  
26 Foundation. A.D.B. was supported by National Institutes of Health R01NS114405 and  
27 R21MH120441. Portions of this work were conducted on an MRI instrument funded by  
28 National Institutes of Health S10OD025025-01. The content is solely the responsibility of  
29 the authors and does not represent the official views of the National Institutes of  
30 Health.

31

32

33 **Abstract**

34

35 Hubs in the human brain support behaviors that arise from brain network interactions.  
36 Previous studies have identified hub regions in the human thalamus that are connected  
37 with multiple functional networks. However, the behavioral significance of thalamic  
38 hubs has yet to be established. Our framework predicts that thalamic subregions with  
39 strong hub properties are broadly involved in functions across multiple cognitive  
40 domains. To test this prediction, we studied human patients with focal thalamic lesions  
41 in conjunction with network analyses of the human thalamocortical functional  
42 connectome. In support of our prediction, lesions to thalamic subregions with stronger  
43 hub properties were associated with widespread deficits in executive, language, and  
44 memory functions, whereas lesions to thalamic subregions with weaker hub properties  
45 were associated with more limited deficits. These results highlight how a large-scale  
46 network model can broaden our understanding of thalamic function for human  
47 cognition.

48

49

50 **Keywords**

51 Thalamus, hub, functional connectivity, memory, executive function, language.

52

53

54

## 55 Introduction

56  
57 Hubs are highly connected network components crucial for network functions. In the  
58 human brain, hubs are thought to facilitate communication between information-  
59 processing systems, and support cognitive functions that likely arise from brain-wide  
60 network interactions (Bertolero et al., 2015; Gratton et al., 2018; van den Heuvel and  
61 Sporns, 2013). Prior studies have identified hubs in frontoparietal association cortices  
62 that have extensive connections with distributed brain regions (Goldman-Rakic, 1988;  
63 Hagmann et al., 2008; Power et al., 2013). These frontoparietal hubs are behaviorally  
64 significant. For example, the connectivity pattern of cortical hubs correlates with  
65 behavioral task performance (Bertolero et al., 2018; Cole et al., 2013), and focal damage  
66 to cortical hubs is associated with behavior across cognitive domains (Reber et al., 2021;  
67 Warren et al., 2014).

68  
69 The human thalamus also possesses hub-like network properties (Cole et al., 2010;  
70 Hwang et al., 2017). The thalamus consists of different constituent subregions, each with  
71 a unique functional, anatomical, and connectivity profile (Sherman and Guillery, 2013).  
72 Many thalamic subregions exhibit “many-to-one” and “one-to-many” connectivity  
73 motifs—a subregion receives converging projections from multiple cortical regions, and  
74 simultaneously projects to multiple cortical regions (Giguere and Goldman-Rakic, 1988;  
75 Guillery and Sherman, 2002; Selemon and Goldman-Rakic, 1988). This connectivity  
76 motif is a hallmark characteristic of higher-order thalamic nuclei (i.e., the mediodorsal  
77 nucleus), and can be supported by a specific group of thalamocortical projection cells,  
78 the “Matrix” cells (Jones, 2009). Matrix cells have a diffuse and distributed projection  
79 pattern; they innervate the superficial layers of multiple cortical regions, crossing  
80 receptive fields and functional boundaries. Consistent with these anatomical features,  
81 formal network analyses have found “connector hubs” in the human thalamus.  
82 Thalamic connector hubs have strong functional connectivity with multiple cortical  
83 networks (Greene et al., 2020; Hwang et al., 2017), and each network can be associated  
84 with a distinct set of cognitive functions (Bertolero et al., 2015; Crossley et al., 2013; Yeo  
85 et al., 2015). This connectivity architecture suggests that a thalamic hub participates in

86 functions that involve multiple networks and might contribute to many different  
87 cognitive functions.

88

89 However, the behavioral significance of this important network position of the  
90 thalamus has yet to be established. Large-scale meta-analyses of functional  
91 neuroimaging research, primarily functional magnetic resonance imaging (fMRI)  
92 studies, have found that tasks from many different cognitive domains (e.g., executive  
93 function, memory, perception) are associated with increased activity in overlapping  
94 thalamic subregions (Hwang et al., 2017; Yeo et al., 2015). Functional neuroimaging  
95 findings are nevertheless correlational, because increased brain activity in response to a  
96 particular behavior is not evidence that this brain region is necessary for the studied  
97 behavior (Sutterer and Tranel, 2017). The lesion method, studying patients with focal  
98 damage to the thalamus, can provide a stronger test of whether thalamic hubs are  
99 necessary for human cognition.

100

101 Based on the prominent hub property of the thalamus, we hypothesize that thalamic  
102 hubs are involved in multi-domain processing involving multiple functional systems  
103 and contribute to behavior across multiple cognitive domains. To test this hypothesis,  
104 we combined neuropsychological evaluations from patients with focal thalamic lesions  
105 with network analyses of the human thalamocortical functional connectome. To  
106 evaluate behavior across cognitive domains, we analyzed neuropsychological tests that  
107 assess executive, language, memory, learning, visuospatial, and construction functions.  
108 To evaluate the hub properties of different thalamic subregions, we used two different  
109 measures: first, a well-established graph-theoretic metric, participation coefficient (PC),  
110 and second, the estimated density of matrix projection cells. PC estimates the  
111 distribution of coupling between a brain region with multiple brain systems in the  
112 functional connectome (Power et al., 2013; Warren et al., 2014). Hub regions with higher  
113 PC values are thought to participate in processes recruiting multiple functional  
114 networks (Shine et al., 2016). Matrix cells in the thalamus diffusely project to multiple  
115 brain regions, and thus thalamic hub regions should have a higher density of matrix  
116 cells. We predict that patients with focal lesions to thalamic subregions with high PC  
117 values and high density of matrix cells will exhibit more extensive impairment across



118 cognitive domains. In contrast, lesions to thalamic subregions with lower PC values and  
119 lower density of matrix cells will exhibit more limited impairment.

120

121

## 122 **Results**

123

124 We identified 20 patients (ages 18–70, 13 males) with focal lesions restricted to the  
125 thalamus, and 42 comparison patients (ages 19–77 years, 21 males) with lesions that  
126 spared the thalamus (Figure 1A). All patients were drawn from the Iowa Neurological  
127 Patient Registry. The registry contains data from patients with focal, stable brain lesions  
128 who have undergone neuropsychological assessment and brain imaging at least three  
129 months after lesion onset. Comparison patients had lesions that spared the thalamus,  
130 but were similar in size to those found in thalamic patients ( $\leq 5088 \text{ mm}^3$ , size of the  
131 largest observed thalamic lesion). Lesion sizes were not significantly different between  
132 groups (thalamus group: mean =  $1364 \text{ mm}^3$ , SD =  $1212 \text{ mm}^3$ ; comparison group: mean =  
133  $1321 \text{ mm}^3$ , SD =  $729 \text{ mm}^3$ ; group difference in lesion size,  $p = 0.38$ ). There were no  
134 significant group differences in age, full scale IQ, verbal IQ, and performance IQ  
135 between thalamus patients and comparison patients (Supplementary Table 1).

136

137 We predicted that lesions to hub regions in the thalamus will affect behavior across  
138 different cognitive domains. To test the behavioral relevance of the thalamic hubs, we  
139 first compared neuropsychological outcomes between the thalamus and comparison  
140 patients. The goal of this comparison was to determine whether lesions of the thalamus  
141 were associated with cognitive impairment, beyond any nonspecific lesion effects. We  
142 analyzed outcome data from several neuropsychological tests, assessing functions from  
143 the following domains: (1) executive function using the Trail Making Test Part B (TMT  
144 Part B); (2) verbal naming using the Boston Naming Test (BNT); (3) verbal fluency using  
145 the Controlled Oral Word Association Test (COWA); (4) immediate learning using the  
146 first trial test score from the Rey Auditory-Verbal Learning Test (RAVLT); (5) total  
147 learning by summing scores from RAVLT, trials one through five; (6) long-term  
148 memory recall using the RAVLT 30-minute delayed recall score; (7) long-term memory  
149 recognition using the RAVLT 30-minute delayed recognition score; (8) visuospatial

150 memory using the Rey Complex Figure delayed recall score; (9) psychomotor function  
151 using the Trail Making Test Part A (TMT Part A); and (10) construction using the Rey  
152 Complex Figure copy test. We grouped these tests into the executive (TMT part B),  
153 verbal (COWA and BNT), memory (RAVLT delayed recall and delayed recognition),  
154 learning (RAVLT immediate learning and total learning), psychomotor (TMT part A)  
155 and visuospatial (Complex Figure tests) domains (Lezak et al., 2012). To adjust for  
156 demographic factors such as age and years of education, all test scores were  
157 transformed to z-scores using published population norms. Statistical significance of  
158 between group comparisons was assessed with the randomized permutation tests  
159 unless otherwise noted.

160  
161 We found that patients with thalamic lesions performed significantly worse than  
162 comparison patients on the following tests: TMT Part B (thalamus patients: mean = 1.97,  
163 SD = 2.96; comparison patients: mean = 0.21, SD = 1.70;  $p = 0.0012$ ); BNT (thalamus  
164 patients: mean = -0.25, SD = 0.73; comparison patients: mean = 0.43, SD = 0.81;  $p =$   
165 0.0043); RAVLT delayed recall (thalamus patients: mean = -0.7, SD = 1.27; comparison  
166 patients: mean = 0.36, SD = 1.06;  $p = 0.0019$ ); and RAVLT delayed recognition (thalamus  
167 patients: mean = -1.26, SD = 2.67; comparison patients: mean = 0.18, SD = 0.87;  $p =$   
168 0.003). The COWA test did not show statistically significant difference after correcting  
169 for multiple comparisons (thalamus patients: mean = -0.41, SD = 1.27; comparison  
170 patients: mean = 0.42, SD = 1.05;  $p = 0.013$ ). Notably, each test had at least one thalamus  
171 patient that performed worse than 95% of the normative population ( $z$ -score < -1.645).  
172 These results suggest that thalamic lesions were associated with more severe behavioral  
173 impairments in executive, verbal, and memory functions relative to comparison patients  
174 that had damage outside of the thalamus.

175

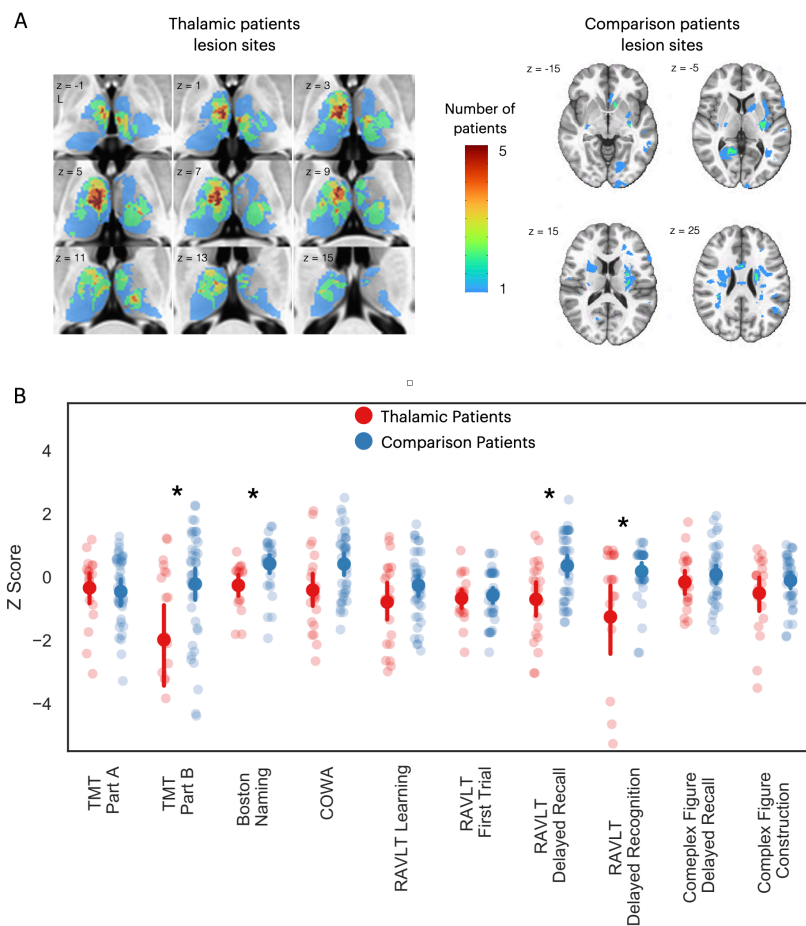

Figure 1. Thalamic patients performed significantly worse on multiple neuropsychological tests compared to comparison patients. (A) Overlap of lesions in patients with thalamic lesions and comparison patients with cortical lesions. (B) Neuropsychological test scores from patients with thalamic lesions and comparison patients. All test scores transformed to z-score using published population norm. Negative z-scores indicate more severe impairment. For each plot, the solid dot depicts the mean, and the bar depicts the 95% bootstrapped confidence interval.

\* Indicates corrected  $p < .05$ .  
TMT: Trail Making Test;  
COWA: Controlled Word Association; RAVLT: Rey's Auditory Verbal Learning Task.

176

177

178

179

180

181 There are two potential models of thalamocortical connectivity that could explain the  
182 observed behavioral impairments. First, each cognitive domain is associated with a  
183 distinct thalamocortical system, thus different task impairments are associated with  
184 segregated lesion sites within the thalamus. Alternatively, thalamic hubs are involved  
185 in many cognitive processes across domains through their widespread connectivity  
186 with multiple systems, and thus lesions to a critical hub region could be associated with  
187 widespread impairment. The first explanation predicts little to no lesion overlap among  
188 different impaired tasks, whereas the second model predicts a high degree of lesion  
189 overlap among the impaired tasks. To discern between these two possibilities, we first  
190 examined lesion sites associated with impaired performance separately for each task

191 (Figure 2A, left panel). Notably, we found an overlapping lesion site in the left anterior-  
192 medio-dorsal thalamus that is associated with impairment across different cognitive  
193 domains (Figure 2A, right panel). This result suggests that a patient with a focal  
194 thalamic lesion to this multi-domain lesion site could exhibit behavioral impairment  
195 across cognitive domains.

196  
197 We plotted the degree of impairment (expressed by z-score) across all tasks and  
198 cognitive domains separately for each patient (Figure 2B), and found that in 12 out of 20  
199 patients, significant impairment ( $z < -1.645$ ) was reported in more than two cognitive  
200 domains. We then examined whether patients with behavioral impairments across  
201 multiple domains had lesions to this identified overlapping site (Figure 2C). We found  
202 that in the 12 patients that exhibited impairment across multiple domains, there was  
203 indeed an overlapping lesion site in the left anterior-medio-dorsal thalamus. This  
204 overlapping site was notably absent in the eight patients that exhibited either no  
205 behavioral impairment or impairment in one single task (Figure 2C, left panel). This  
206 pattern was also observed when examining lesion sites from individual patients, as  
207 individual patients with impairments across multiple domains had lesions that  
208 overlapped with this left anterior-medio-dorsal thalamic region (Supplementary Figure  
209 1).

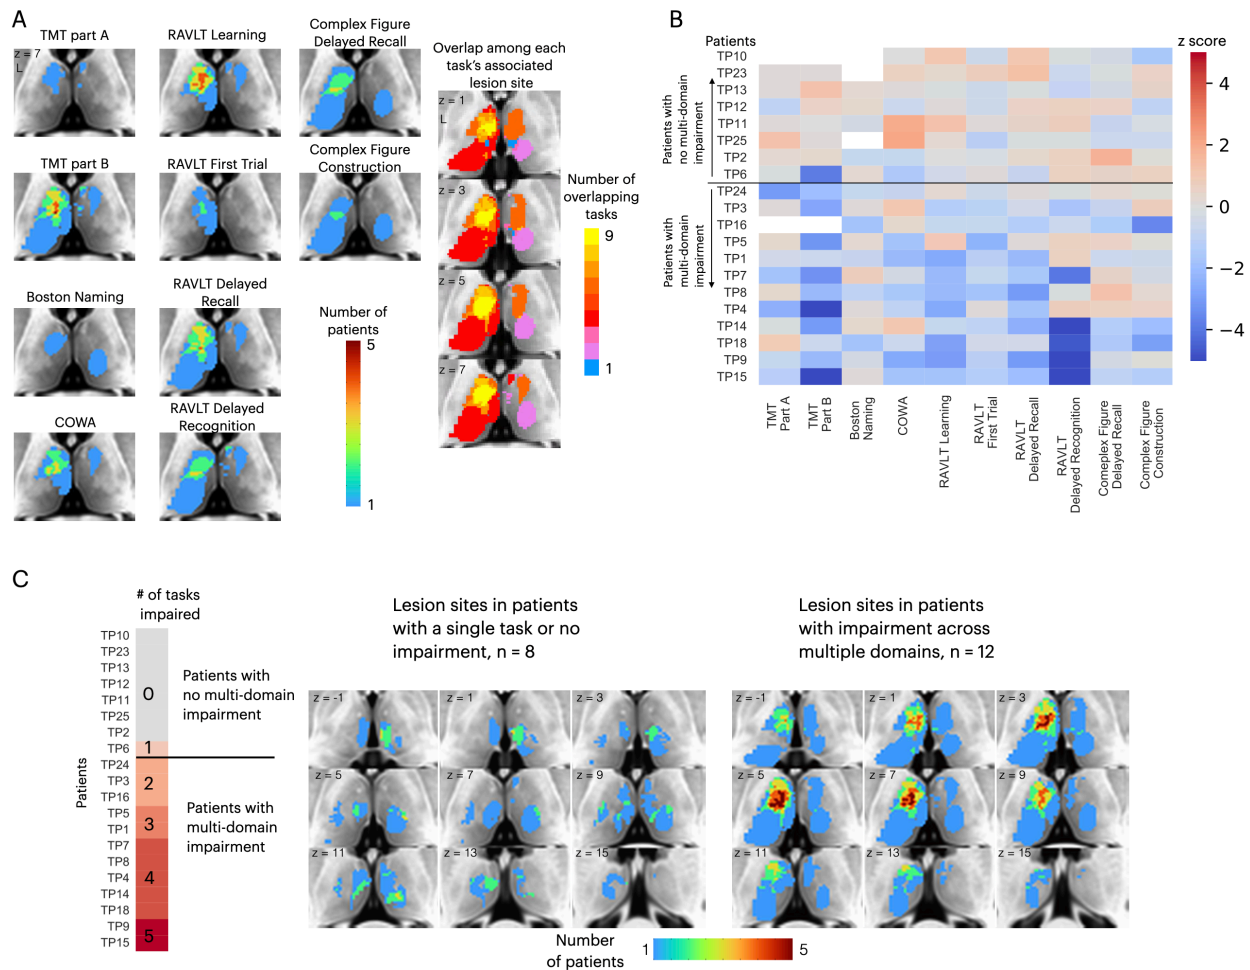

210

Figure 2. Lesions associated with impaired performance on tasks across multiple cognitive domains. (A) Left panel: overlap of lesion masks from subjects with impaired test performance on each task. Impaired task performance defined as  $z < -1.645$  (95 percentile in  $z$  distribution). Right panel: overlap of lesion sites associated with impairment on each individual task (summing each individual task's lesion map from the left panel). (B) Table showing each thalamus patient's task performance on 10 different neuropsychology tests. For all tasks, negative  $z$ -scores indicate more pronounced impairment. Both TMT Part A and Part B scores were inverted to match the directionality of other tests. (C) Left panel: classifying thalamic patients into groups that exhibit impairment in one versus multiple tasks across cognitive domains. Right panel: Lesion sites in patients with or without impairment across multiple tasks.

211

212

213 We further tested whether lesions to the left anterior-medio-dorsal thalamus were  
 214 associated with broad impairment across more cognitive domains rather than being  
 215 driven by more severe deficits in a limited number of domains. For this purpose, we  
 216 included an expanded group of 320 comparison patients from the Iowa Neurological

217 Patients Registry (ages 19–81 years, 163 males; for lesion coverage see Supplementary  
218 Figure 2). Unlike the first group of comparison patients (Figure 1), these comparison  
219 patients were not matched with the thalamus patients on the lesion size, but on the  
220 averaged severity of behavioral deficits averaged across all 10 neuropsychology tests.  
221 We predicted that when matched on the severity of behavioral deficit, patients with  
222 lesions that overlapped with the left anterior-medio-dorsal thalamus would exhibit  
223 impairments on more cognitive domains, whereas comparison patients will exhibit  
224 more circumscribed deficits in fewer cognitive domains. To test this prediction, we first  
225 calculated an “average impairment score” by averaging the normalized z-scores across  
226 all 10 neuropsychological tests, and a “multi-domain impairment score” by summing  
227 the number of tests with significant behavioral deficits (defined as  $z < 1.645$ ). Both  
228 scores regressed out the variance associated with differences in lesion size. We then fit  
229 separate linear regression models for thalamus patients and a group of 320 comparison  
230 patients that had average impairment scores similar to thalamus patients (maximum =  
231 1.39, minimum = -1.59). We found that 11 out of 12 thalamus patients with lesions that  
232 overlapped with the left anterior-medio-dorsal thalamus (Figure 2C) exhibited higher  
233 multi-domain impairment score when compared to comparison patients (Figure 3). This  
234 suggests that lesions to the left anterior-medio-dorsal thalamus are not merely  
235 associated with more severe behavioral impairment, but also associated with  
236 impairment across multiple cognitive domains to a greater extent than would be  
237 expected from lesions in other brain regions.

238

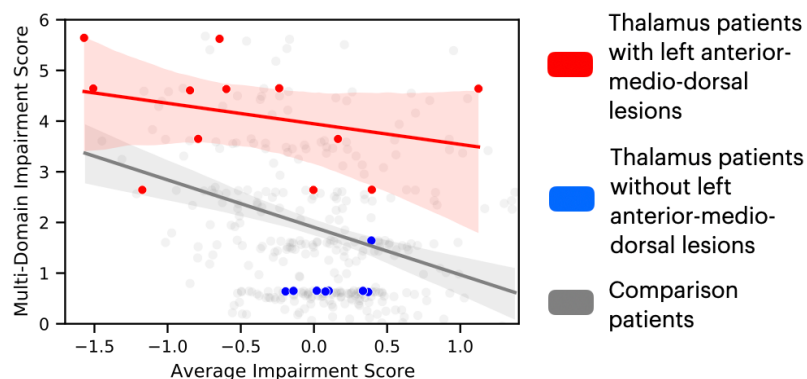

239

240

241

242

Figure 3. Comparing the degree of average behavioral impairment (x axis) and multi-domain behavioral impairment (y axis) between thalamus patients and comparison patients. More negative average impairment score represents more severe behavioral impairment. Higher multi-domain impairment score indicate more cognitive domains were affected. Individual dots represent individual patients. Solid lines indicate fitted regression lines for each patient group, shaded are represents 95% confidence interval.



243 Because it is possible that impairment across cognitive domains was driven by larger  
244 lesions that damaged many functionally-specialized subregions in the thalamus, we  
245 tested whether there was a significant association between lesion size and the extent of  
246 behavioral impairment. We found that there was no significant correlation between  
247 lesion volume and number of cognitive domains impaired ( $r(19) = 0.21$ ,  $p = 0.36$ ).  
248 Furthermore, patients with impairment in more than two cognitive domains did not  
249 have larger lesions when compared to patients with impairment in less than two  
250 cognitive domains (randomized permutation test  $p = 0.42$ ).

251  
252 We further evaluated the brain activity maps likely associated with the putative  
253 cognitive processes assessed by each of the neuropsychological tests we assessed.  
254 Specifically, we utilized the Neurosynth database (Yarkoni et al., 2011), which contains  
255 activation loci from thousands of published fMRI studies, to perform automatic meta-  
256 analyses and identify brain regions likely recruited for each task. We queried the  
257 following terms: “executive function”, “recall”, “recognition”, “fluency”, “naming”. We  
258 found that these terms were associated with distinct brain activity maps with minimal  
259 overlap (Figure 4). Maps for terms “naming” and “fluency” overlapped in the left  
260 frontal cortex, maps for “recall” and “recognition” overlapped in temporal cortices, and  
261 all four maps overlapped in a small region (three  $2 \text{ mm}^3$  voxels) in the left inferior  
262 frontal gyrus.

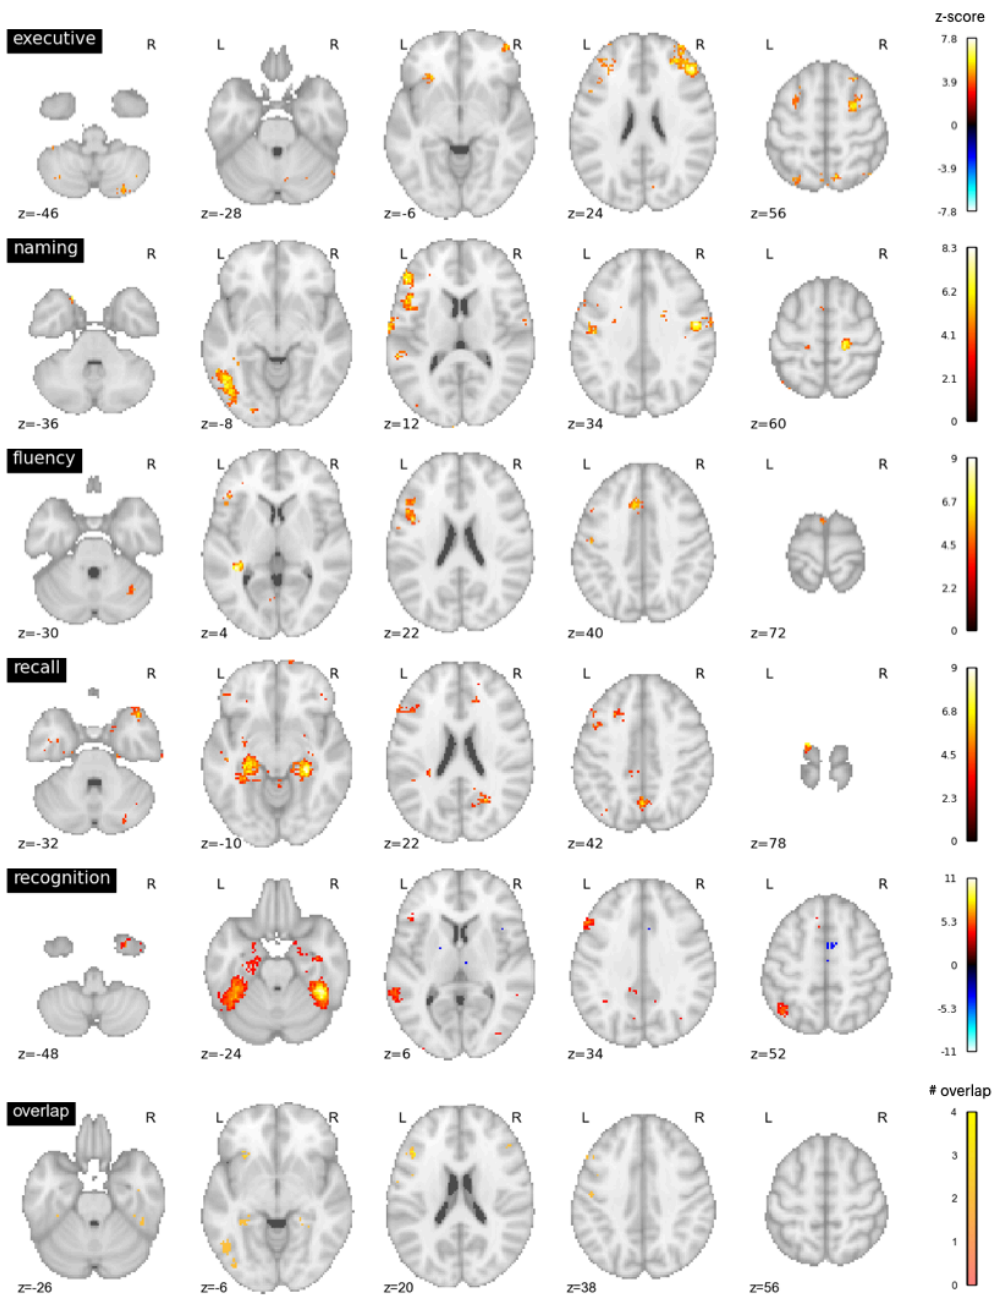

263

Figure 4. Neurosynth metanalyses. Top four rows: brain regions associated with putative cognitive processes assessed by the TMT Part B, BNT, COWA, RAVLT delayed recall, and RAVLT delayed recognition tests. Color bar represents the strength of association in z-score. Bottom row: overlap between the top four maps. Maps for “naming” and “fluency” overlapped in the left frontal cortex, maps for “recall” and “recognition” overlapped in temporal cortices. All four maps overlapped with 6 voxels in the left middle frontal gyrus.



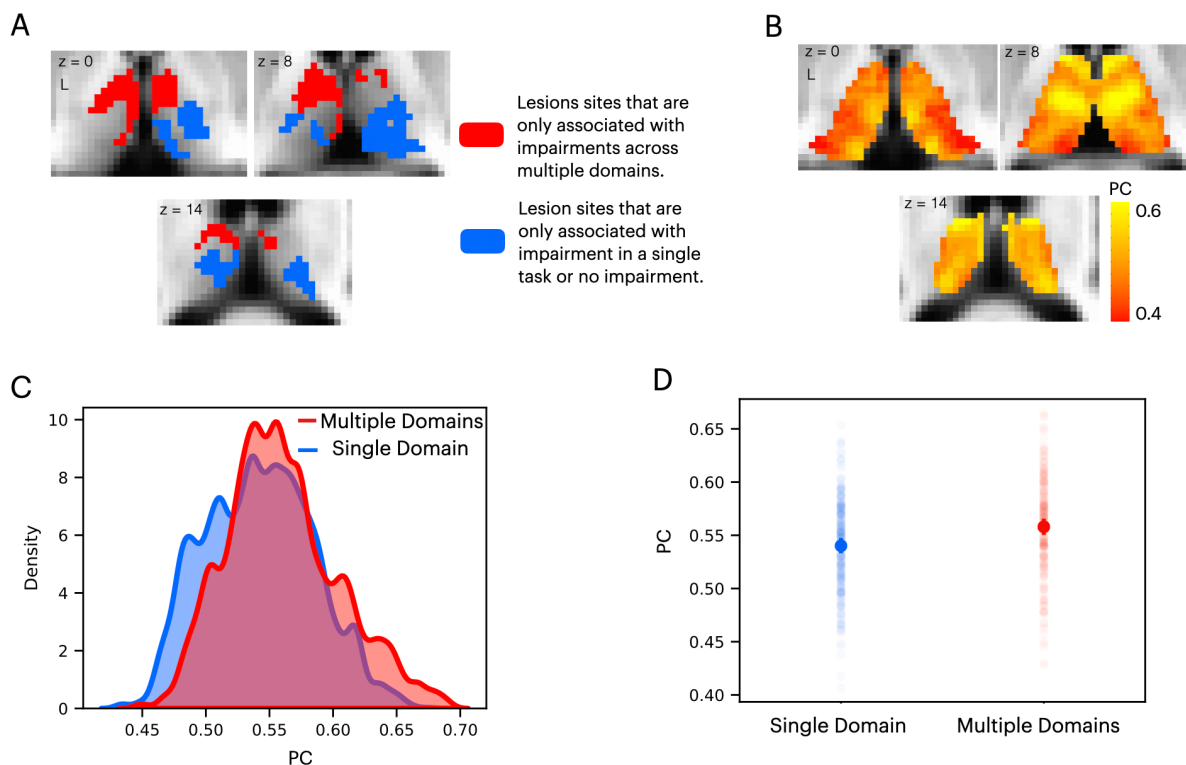

264

Figure 5. Lesions to thalamic regions with strong hub property are associated with behavioral impairment across cognitive domains. (A) Thalamic lesion sites associated with multitask impairment are located in the anterior-medio-dorsal thalamus. (B) Right panel: left medial and anterior thalamus is associated with prominent hub property (measured by participation coefficient [PC]). (C) Kernel density plot of voxel-wise PC values from lesion sites associated with multiple domain and single domain impairment. Voxel-wise PC values were significantly higher for multi-domain lesion sites. The y-axis was scaled so area under the curve is summated to one. (D) In a group of 235 subjects, PC values were significantly higher in multi-domain versus single domain lesion sites. Each data dot indicates PC value from one normative subject.

265

266

267 We performed additional analyses to contrast the hub properties between thalamic  
268 lesion sites that were only observed in patients that exhibited impairment across  
269 multiple domains, versus lesion sites only observed in patients that exhibited no  
270 behavioral impairment or impairment in a single domain (Figure 5A). Lesion sites that  
271 overlapped between patients that exhibited multi-domain impairment and patients  
272 with no behavioral impairment were excluded. Our prediction was that lesions to  
273 thalamic regions exhibiting prominent hub properties—as measured with PC—will  
274 have an association with widespread negative behavioral outcomes across multiple

275 domains. In contrast, lesions to thalamic regions with lower hub properties will have  
276 less widespread association. We calculated the PC value for each thalamic voxel using a  
277 large normative thalamocortical functional connectome dataset (Hwang et al., 2017).  
278 The purpose was to estimate hub properties of thalamic subregions in the healthy  
279 population, and use this result to estimate hub properties of the lesion sites. Briefly, for  
280 each normative subject, we calculated thalamocortical functional connectivity between  
281 thalamic voxels and 400 cortical regions of interests (ROI), spanning seven canonical  
282 cortical networks (Schaefer et al., 2018). We did not calculate functional connectivity  
283 between thalamic voxels. Voxel-wise PC values were calculated for each subject, and  
284 averaged across subjects. A high PC value indicates that a hub region has distributed  
285 connectivity with multiple cortical networks. We found that when averaged across  
286 normative subjects, the anterior, medial, and dorsal thalamus exhibit strong connector  
287 hub properties (Figure 5B). We then compared the distribution of voxel-wise PC values  
288 between the multi-domain and single-domain lesion sites using the Komogorov-  
289 Smirnov test, and found that thalamic voxels in the multi-domain lesion sites had on  
290 average higher PC values compared to those in the single domain lesion sites (Figure  
291 5C). The voxel-wise PC values were significantly higher in the multi-domain sites  
292 compared to the single-domain sites (Kolmogorov-Smirnov  $d = 0.16$ ,  $p < 0.001$ ;  
293 replication dataset: Kolmogorov-Smirnov  $d = 0.11$ ,  $p < 0.001$ ). We then statistically  
294 compared PC values between multi-domain and single-domain sites across normative  
295 subjects, and found that the multi-domain sites exhibited significantly higher PC values  
296 (Figure 5D,  $t(234) = 6.472$ ,  $p < 0.001$ ; replication dataset:  $t(61) = 3.21$ ,  $p = 0.002$ ),  
297 confirming our central prediction.

298  
299 This finding suggests that lesion sites associated with impairment across cognitive  
300 domains have a diverse functional relationship with distributed systems involved in  
301 different cognitive functions. Thus, we mapped the cortical functional networks that  
302 show strong functional connectivity with voxels within the multi-domain lesion site.  
303 For every thalamic voxel, we calculated its average functional connectivity with seven  
304 cortical functional networks (Schaefer et al., 2018), including the visual, somatomotor  
305 (SM), limbic, dorsal attention (DA), cingulo-opercular (CO), frontoparietal (FP), and  
306 default mode (DMN) networks. We then divided the functional connectivity estimates  
307 of each network by the total summated functional connectivity strength of each voxel.

308 The purpose of this procedure was to derive a functional connectivity weight ratio  
309 estimate to assess the network selectivity of each voxel. If a voxel only interacts with a  
310 specific network, the majority of its functional connectivity strength should be devoted  
311 to that network, resulting in a high functional connectivity weight ratio, whereas  
312 connectivity with other networks should be considerably lower. In contrast, if a voxel is  
313 broadly interacting with multiple functional networks, then it should exhibit  
314 overlapping functional connectivity weight ratios for those networks. Consistent with  
315 the high PC values we observed, we found that thalamic voxels in the multi-domain  
316 lesion sites exhibit a diffuse functional connectivity relationship with cortical functional  
317 networks that are predominately located in heteromodal association areas, including  
318 the FP, DMN, limbic, and CO networks (Figure 6A). The centroids of functional  
319 connectivity weights were between 0.15–0.3 for these networks, and lower (close to 0)  
320 for the visual, SM, and DA networks.

321  
322 We repeated the functional connectivity weight ratio analysis to assess functional  
323 connectivity between thalamic voxels and cortical regions identified via the Neurosynth  
324 meta-analyses (Figure 4). Specifically, we calculated the functional connectivity between  
325 each thalamic voxel and cortical voxels associated with each queried term (“executive”,  
326 “naming”, “fluency”, “recall”, “recognition”), then divided the averaged functional  
327 connectivity estimates of each term by the total summated functional connectivity  
328 strength of each voxel. The purpose was to determine whether there are voxels only  
329 selectively interacting with brain regions associated with specific cognitive processes.  
330 We also found a distributed thalamocortical functional connectivity relationship with  
331 brain regions associated with these putative cognitive processes (Figure 6B). Higher  
332 functional connectivity weight ratios were found for regions implicated in “executive”  
333 and “fluency”, and lower ratio for “naming”, “recall” and “recognition”. Notably, we  
334 did not observe a pattern that would indicate strong functional specificity, as the  
335 highest observed weight ratio was less than 37 percent. This result suggests that the  
336 thalamic hub region is not selectively interacting with a specific cortical system, instead  
337 it diffusely interacts with distinct brain regions associated with these varied cognitive  
338 processes.

339

340 The thalamus is also known to have dozens of constituent nuclei that can be defined  
341 using chemoarchitectural and cytoarchitectural properties. We further examined which  
342 thalamic nuclei overlapped with the multi-domain lesion sites, by calculating the  
343 percentage of lesioned voxels within the multi-domain lesion sites for each thalamic  
344 nucleus. Thalamic nuclei were defined using a published atlas derived from  
345 postmortem human brains (Krauth et al., 2010). We found that the multi-domain lesion  
346 sites overlap with several higher-order thalamic nuclei, including the anterior nucleus  
347 (AN), the mediodorsal nucleus (MD), the ventromedial nucleus (VN), the intralaminar  
348 nucleus (IL), as well as other nuclei, including the ventro anterior (VA) and the  
349 ventrolateral (VL) nuclei (Figure 6C).

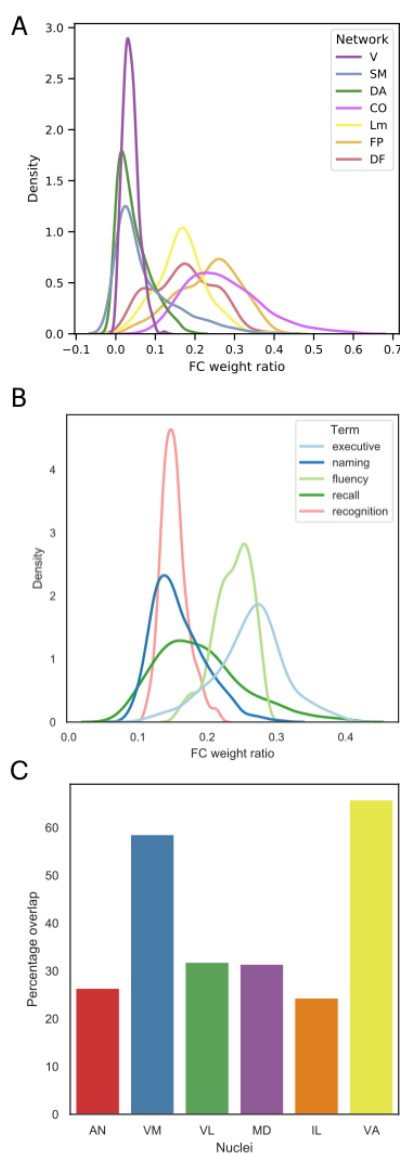

Figure 6. (A) Voxel-wise kernel density plot of thalamocortical functional connectivity weight for each cortical network. Voxels in the multi-domain lesion site exhibit stronger functional connectivity with the cingulo-opercular (CO), limbic (Lm), fronto-parietal (FP), and default mode (DMN) networks. Weaker connectivity with visual (V), somatomotor (SM), and dorsal attention (DA) networks. (B) Voxel-wise kernel density plot of thalamocortical functional connectivity weight with cortical regions identified via Neurosynth meta-analyses. For both (A) and (B), higher weight ratio indicates functional specificity, suggesting that voxel is selectively interacting with a specific cortical system. (C) The multi-domain lesion site overlaps with higher-order thalamic nuclei, including the anterior (AN), ventromedial (VM), mediodorsal (MD), intra-laminar (IL), ventro-anterior (VA), and ventrolateral (VL) nuclei.

351 Thalamic subdivisions are comprised of a mixture of “Core” and “Matrix”  
352 thalamocortical projections cells, and each type has a different projection pattern to the  
353 cortex (Jones, 2009, 2001). Calbindin-rich matrix cells project diffusively to the  
354 superficial layers of the cerebral cortex, unconstrained by functional borders between  
355 cortical regions. In contrast, parvalbulmin-rich core cells send topographic specific  
356 projections to the middle layers of the cerebral cortex. The distributed projection pattern  
357 of matrix cells is conceptually analogues to the inter-network connectivity property of  
358 connector hubs. Therefore, we further predicted that the multi-domain lesion sites  
359 would contain relatively higher concentrations of matrix cells when compared to the  
360 single-domain lesion sites. To test this prediction, we examined data from the Allen  
361 Human Brain Atlas that estimated the brain-wide expression of calbindin and  
362 parvalbulmin proteins, CALB1 and PVALB, respectively (Gryglewski et al., 2018). This  
363 allowed us to estimate the relative density of matrix and core cells in each thalamic  
364 voxel (Müller et al., 2020). We found that CALB1 were more strongly expressed in the  
365 anterior-medio-dorsal thalamus (Figure 7A), suggesting that multi-domain lesion sites  
366 likely contain higher densities of matrix projection cells. We then compared the  
367 distribution of voxel-wise CALB1 expression between the multi-domain and single-  
368 domain lesion sites using the Komogorov-Smirnov test, and found that thalamic voxels  
369 in the multi-domain lesion sites had on average higher CALB1 expression when  
370 compared to those in the single domain lesion sites (Figure 7B; Kolmogorov-Smirnov  $d$   
371 = 0.483,  $p < 0.001$ ). This suggests that the multi-domain lesion sites had more matrix  
372 cells when compared to the single-domain lesion sites. In contrast, thalamic voxels in  
373 the single-domain lesion sites had on average higher PVALB expression compared to  
374 those in the multi-domain lesion sites (Figure 7C; Kolmogorov-Smirnov  $d = 0.482$ ,  $p <$   
375  $0.001$ ), suggesting relatively higher concentrations of core cells in the single-domain  
376 lesion sites.  
377

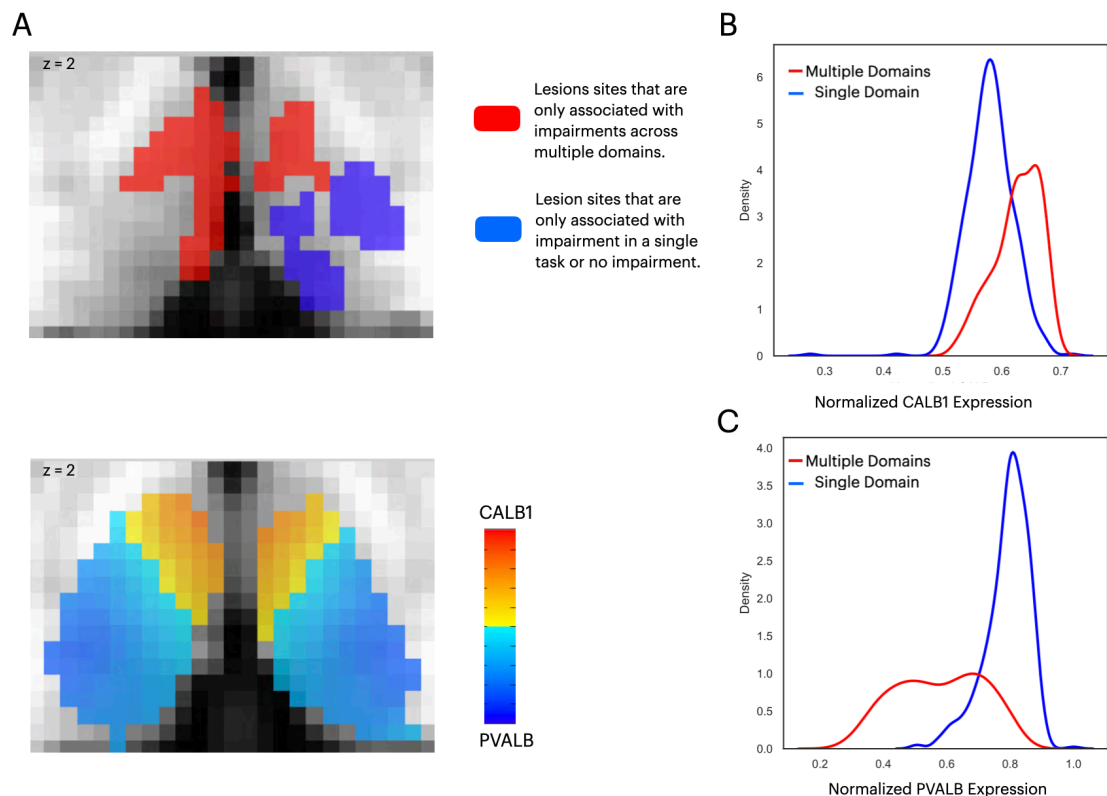

378

379

380 Figure 7. (A) The anterior-medial thalamus had a relative higher expression of CALB1  
381 (lower panel), which overlapped with the multi-domain lesion sites (upper panel).  
382 Color intensity in the lower panel denotes the relative expression of CALB1 and  
383 PVALB in different thalamic voxels (Jones, 2009; 2001). (B) Voxel-wise kernel density  
384 plot of normalized CALB1 expression level for the multi-domain versus the single-  
385 domain lesion sites. (C) Voxel-wise kernel density plot of normalized PVALB  
386 expression level for the multi-domain versus the single-domain lesion sites.

385

386

387

## 388 Discussion

389

390 Prior studies that examined the network organization of the human brain have  
391 consistently identified the thalamus as a prominent hub. Within the thalamus there are  
392 regional differences in relative hubness, with the anterior, medial, and dorsal thalamus  
393 found to exhibit the strongest hub property and broadly connected with distributed  
394 functional networks (Cole et al., 2010; Hwang et al., 2017). This connectivity architecture  
395 likely allows the thalamus to flexibly participate in functions that support cognition



396 across multiple domains. Findings from the current study provide empirical evidence  
397 that confirms the behavioral significance of this network architecture.

398  
399 The lesion method is well suited for determining the relationship between thalamic  
400 hubs and cognition. Lesioning a hub region should weaken network interactions across  
401 multiple systems, and have a widespread influence on behavior across cognitive  
402 domains. In contrast, lesioning a thalamic subregion with a specific cognitive function  
403 should have a more limited effect. Past studies have found that lesions to the human  
404 thalamus are associated with a wide range of cognitive impairments, including  
405 executive dysfunction (Hwang et al., 2020; Liebermann et al., 2013), amnesia (Graff-  
406 Radford et al., 1990; Pergola et al., 2016; von Cramon et al., 1985), aphasia (Crosson et  
407 al., 1986; Graff-Radford et al., 1984), and attention deficits (de Bourbon-Teles et al., 2014;  
408 Snow et al., 2009). However, it is not clear whether deficits reported in prior studies  
409 each localize to distinct thalamic regions, or whether a restricted lesion to a hub region  
410 can be associated with widespread effects. Our findings help to answer this question.

411  
412 Specifically, we found significant impairment on the TMT Part B, RAVLT, and BNT  
413 tests in patients with lesions to an overlapping region in the left anterior-medio-dorsal  
414 thalamus. Of note, basic perceptual and motor functions in thalamic patients were  
415 comparable to comparison patients, given that we did not find a significant difference  
416 in the TMT Part A and Rey Complex Figure construction test. Thus, the impairment we  
417 observed is related to higher-order cognitive processes related to language, memory,  
418 and executive functions. How can a thalamic subregion be simultaneously associated  
419 with executive, language, and memory functions? Our framework suggests that each of  
420 these cognitive domains is associated with a different brain system, and these brain  
421 systems have converging connectivity with the multi-domain lesion site that we  
422 identified. In support, we found that this lesion site exhibited a strong connector hub  
423 property, with a diverse functional connectivity relationship with multiple cortical  
424 networks. Importantly, the connector hub property of this multi-domain lesion site was  
425 greater than lesion sites that were associated with more limited impairment, again  
426 confirming the behavioral relevance of network hubs.

427

428 We suspect that the left thalamus is involved because language-related functions are  
429 more lateralized to the left hemisphere, and cognitive performance using standard  
430 neuropsychological tests tends to be left-lateralized (Bowren et al., 2020). Successful  
431 performance on the delayed recall and delayed recognition tests likely requires a long-  
432 term memory system within which the anterior thalamus is a pivotal component,  
433 interlinking the hippocampal and cortical systems (Aggleton et al., 2010). Prior studies  
434 on lesion symptom mapping have found that TMT and language-related tasks are  
435 associated with medial frontal, lateral frontal, and temporal cortices (Baldo et al., 2013;  
436 Gläscher et al., 2012). These brain regions likely overlap with the FP, CO, and DF  
437 networks that we found to have strong functional connectivity with the multi-domain  
438 lesion site. Furthermore, these cortical regions are known to receive anatomical  
439 projections from the anterior and mediodorsal nuclei, which we also found to overlap  
440 with the identified lesion site (Barbas et al., 1991; Giguere and Goldman-Rakic, 1988;  
441 Selemon and Goldman-Rakic, 1988). In addition to the anterior and mediodorsal nuclei,  
442 the multi-domain lesion sites also overlapped with the intralaminar and ventromedial  
443 nuclei. These thalamic nuclei are known to have higher densities of matrix projection  
444 cells (Jones, 2009). Matrix cells broadly project to multiple cortical regions crossing  
445 receptive fields and functional boundaries (Jones, 2001), an anatomical feature that is  
446 consistent with the network properties of thalamic connector hubs.

447  
448 How do thalamic connector hubs support cognitive functions across these diverse  
449 domains? Studies on brain network organization may offer some insights. For example,  
450 brain functions engage functional segregation, where segregated systems can perform  
451 specialized functions without interference, and functional integration, where outputs  
452 from specialized systems can be integrated between domains via connector hubs that  
453 interlink distributed systems (Bertolero et al., 2015; Cohen and D'Esposito, 2016; Shine  
454 et al., 2016). This modular-like organization balances segregated and integrated  
455 processes and can be reliably observed in the human brain (Meunier et al., 2010; Sporns  
456 and Betzel, 2016). Furthermore, an optimal modular structure has been found to  
457 correlate with behavioral performance on tasks across multiple domains (Bertolero et  
458 al., 2018), and lesions to connector hubs, including the thalamus, have been shown to  
459 disrupt modular organization more so than other non-hub lesions (Gratton et al., 2012;  
460 Hwang et al., 2017). Therefore, lesions to thalamic hubs may disrupt the optimal



461 organization of multiple systems via its widespread thalamocortical connectivity, and  
462 affect both functional segregation and integration. This disruption will not be limited to  
463 one system, a prediction that is consistent with our finding. Thus, one hypothetical  
464 function of thalamic connector hubs is to maintain a cognitively optimal architecture  
465 across multiple functional systems to support diverse cognitive processes.

466  
467 Another explanation of thalamic lesions associated with behavioral impairment on  
468 multiple tasks is that thalamic lesions are associated with distal disruptions  
469 (“diaschisis”; Sutterer and Tranel, 2017, Von Monakow, 1911) of cortical systems  
470 involved in control functions that impact behavior across multiple cognitive domains.  
471 For example, we found that the multi-domain lesion site has strong functional  
472 connectivity with FP and CO networks, which are cortical networks hypothesized to be  
473 involved in domain general processes such as maintaining task-relevant information,  
474 guiding relevant sensory inputs toward the correct behavioral output, and adjusting  
475 behavior when errors are made (Dosenbach et al., 2008; Gratton et al., 2018). It is also  
476 possible that thalamic lesions disrupt processing in a hypothetical supraordinate,  
477 domain-general cortical system, known as the “Multi-Demand System” (Cole et al.,  
478 2013; Duncan, 2010). The multi-demand system consists of a set of medial frontal, lateral  
479 frontal, and posterior parietal regions do not have clear functional specializations, but  
480 are instead broadly tuned to implement operations that might be required to perform  
481 the different neuropsychological tests that we utilized. This system spatially overlaps  
482 with the CO and FP networks (Gratton et al., 2018), and a prior study found strong  
483 functional connectivity between this multi-domain system with the anterior and dorsal  
484 thalamus (Assem et al., 2020), which overlaps with the multi-domain lesion site that we  
485 identified. Thus, lesions to thalamic hubs may disrupt functions associated with the CO  
486 and FP networks, or the multi-demand system, which in term affect functions that are  
487 necessary for cognition across domains.

488  
489 One caveat of our study is we might have missed other multi-domain lesion sites. For  
490 example, the posterior thalamus could be involved in integrating visual and  
491 visuospatial attention functions (Greene et al., 2020), but we did not have adequate  
492 lesion coverage to test this. It is possible that each of these neuropsychological tasks  
493 recruits a distinct, parallel thalamocortical circuitry (Alexander et al., 1986), and that

494 larger lesions can cover many small specialized subregions in the thalamus, thus  
495 affecting behavior across cognitive domains. Results from ours and previous studies do  
496 not support for this explanation. First, lesion size did not correlate with the degree of  
497 multi-domain impairment. Second, we observed multi-domain impairment in several  
498 patients with restricted lesions to the left anterior-medio-dorsal thalamus. Third,  
499 previous large-scale meta-analyses of fMRI research have found that multiple tasks  
500 increased activity in overlapping thalamic subregions, but not segregated thalamic  
501 subregions (Hwang et al., 2017; Yeo et al., 2015). Fourth, our functional connectivity  
502 weight ratio analysis also showed that most, if not all voxels in the multi-domain lesion  
503 site have a broad functional connectivity relationship with multiple cortical networks.  
504 Finally, Neurosynth queries showed that cognitive processes putatively involved in the  
505 impaired neuropsychological tests each associated different sets of spatially segregated  
506 brain regions. In other words, the multi-domain lesion site does not appear to have  
507 strong functional specificity. Thus, while it is possible that the lesion method does not  
508 have the resolution and anatomical specificity to detect lesions that cover many small,  
509 spatially-restricted, functionally-specific thalamic subregions, our results do not  
510 support this interpretation. Instead, the cross-domain impairment that we observed  
511 were likely associated with lesions to thalamic hubs that have a converging relationship  
512 with multiple systems.

513  
514 To conclude, the principal contribution of our study is to demonstrate the behavioral  
515 significance of thalamic hubs. We found that a thalamic hub in the left anterior-medio-  
516 dorsal thalamus is critical for memory, executive, and language-related functions. This  
517 significant behavioral profile supports the prominent network position of the thalamic  
518 hub. These findings lead to the question: what is the function that is implemented by a  
519 thalamic hub that allows it to be broadly involved in cognition? Our findings constrain  
520 the possible answers—it must be processes that are not specific to a single cognitive  
521 function but can be generalized across domains. As discussed above, one possibility is  
522 that thalamic hubs maintain an optimal functional network structure, to promote both  
523 segregated and integrated functions, which are domain-general network processes that  
524 support cognition across multiple domains.

525

526

## 527 **Methods**

528

### 529 *Subjects*

530

531 We studied 382 neurological patients (mean age = 52.51, age range = 18–81 years, SD =  
532 14.05 years, 193 males). These participants were selected from the Iowa Neurological  
533 Patient Registry, and had focal lesions caused by ischemic stroke, hemorrhagic stroke,  
534 or benign tumor resection. Patients with learning disabilities, substance abuse, or  
535 premorbid personality disorders were excluded from the study. Neuropsychological  
536 assessment was conducted at least three months post-lesion onset. We first identified 20  
537 patients with lesions restricted in the thalamus caused by ischemic or hemorrhagic  
538 stroke (age = 18-70 years, mean = 55.8 years, SD = 13.94 years, 13 males). In addition to  
539 patients with focal lesions within the thalamus, we included comparison patients that  
540 had lesions outside of the thalamus, in an attempt to control for lesion effects not  
541 specific to the thalamus. Given that lesion size correlates with behavioral impairment  
542 (Reber et al., 2021), we first tried to minimize any bias that could be introduced by  
543 different lesion sizes between the two patient groups. Thus, the first group of 42  
544 comparison patients had lesion sizes that were equal to or smaller than the largest  
545 lesion size we observed in the thalamus group (ages 19–77 years, mean = 54.25 years,  
546 SD = 12.19 years, 21 males). We further included an expanded group of comparison  
547 patients with 320 patients (ages 19-81, mean = 52.34 years, SD = 14.3 years, 163 males).  
548 The expanded comparison patients had lesions outside the thalamus, not matched in  
549 lesion size but the overall averaged severity of behavioral deficit with the thalamus  
550 patients. Demographic data for all patients are presented in Supplementary Table 1. All  
551 participants gave written informed consent, and the study was approved by the  
552 University of Iowa Institutional Review Board.

553

554

### 555 *Neuropsychological Assessment*

556

557 A set of standardized neuropsychological tests was used to assess neuropsychological  
558 outcomes. To account for age-related effects, all test scores were converted to age-  
559 adjusted z-scores using the mean and standard deviation from published population

560 normative data. We determined the behavioral domain that each test assessed, as  
561 described in *Neuropsychological Assessment* (Lezak et al., 2012). We compared test  
562 outcomes between thalamus and comparison patients using the non-parametric  
563 randomized permutation test. Each test creates an empirical null distribution of no  
564 group difference between patients by randomly permuting group membership  
565 (thalamus or comparison patients) of each test score while keeping the number of  
566 patients in each group constant. We reported significant results after correcting for  
567 multiple comparisons using the Bonferroni correction (10 neuropsychological tests,  $p <$   
568 0.005).

569  
570 We used TMT Part B test scores to assess executive function. Stimuli in TMT Part B  
571 consist of both numbers and letters scattered on a page, and patients are asked to use a  
572 pencil to connect circles between them, in an alternating sequence (i.e., 1-A-2-B-3-C,  
573 etc.) as quickly as possible. TMT Part B is considered to be a test of control-related  
574 functions that include working memory and cognitive flexibility (Crowe, 1998; Kortte et  
575 al., 2002). In contrast, TMT Part A is an easier test, which requires patients to use a  
576 pencil to connect 25 circled numbers in numeric order as quickly as possible. Part A is  
577 thought to test psychomotor functions (Bowie and Harvey, 2006).

578  
579 The Boston Naming and COWA tests were used to assess verbal naming and verbal  
580 fluency functions. The Boston Naming Test consists of 60 line drawings depicting  
581 objects for subjects to name (Tombaugh and Hubley, 1997). COWA presents a set of  
582 letters; subjects are then asked to say as many words as they can think of that begin  
583 with a given letter (Ruff et al., 1996).

584  
585 Various components from RAVLT were used to assess learning and memory functions  
586 (Vakil and Blachstein, 1993). Subjects were presented with a 15-word list and then asked  
587 to repeat as many words as they could over five recall trials. They were then given a  
588 delayed recognition and a delayed recall test after a 30-minute delay. Delayed recall and  
589 delayed recognition test scores were calculated using correct recalls/recognitions minus  
590 the number of false recalls/recognitions. We did not administer the “Trial B”  
591 interference procedure. We assessed the immediate learning capacity from the score of  
592 the first trial (RAVLT first trial, also known as immediate recall), the cumulative of

593 learning outcome (summing the scores across the five trials; RAVLT learning), and  
594 long-term verbal memory (RAVLT delayed recall and RAVLT delayed recognition).

595

596 We used the Rey-Osterrieth Complex Figure Test to assess visuospatial memory and  
597 construction (Fastenau et al., 1999). The Rey-Osterrieth figure was presented, and  
598 subjects were asked to copy the figure onto a blank paper (the copy trial). After a 30-  
599 minute delay, subjects were asked to recall and draw the figure from memory (the  
600 delayed recall trial). We did not administer the immediate recall test. A standardized  
601 scoring system was used to assess the accuracy of a subject's copy and recall  
602 performances (Meyers and Meyers, 1995).

603

604

605 *Anatomical analysis of lesion location*

606

607 The anatomic location and spatial extent of each lesion was determined using available  
608 T1, T2, and computed tomography data. Because all patients were selected from the  
609 Iowa Neurological Patient Registry, which has been continuously enrolling patients for  
610 decades, imaging data were acquired using a variety of sequences. For T1 and T2 data,  
611 most images were acquired with  $0.9375 \times 0.9375 \times 1.5 \text{ mm}^3$  or  $1 \times 1 \times 1 \text{ mm}^3$  resolution;  
612 for computed tomography data, data were acquired with  $0.94 \times 0.94 \text{ mm}^2$  in-plane  
613 resolution, with slice thickness ranging from 2 to 5 mm. All lesions were manually  
614 traced by trained technicians and reviewed by a board-certified neurologist (co-author  
615 A.D.B.), who was blinded to neuropsychological outcome results. Lesion masks were  
616 transformed to the Montreal Neurological Institute (MNI) International Consortium for  
617 Brain Mapping (ICBM) 152 Nonlinear Asymmetrical template, version 2009c, using a  
618 procedure that we reported previously (Hwang et al., 2020). Briefly, we used a high-  
619 deformation, non-linear, enantiomorphic, registration procedure from the Advanced  
620 Normalization Tools (Avants et al., 2009; Brett et al., 2001; Nachev et al., 2008). This  
621 high-deformation, non-linear registration procedure allows local deformation to  
622 account for differences in size and shape between brain structures. We used  
623 enantiomorphic normalization to insert voxel intensities from the non-damaged  
624 homologue of the lesion site in place of the manually-defined lesion mask to improve  
625 transformation accuracy. After transformation, lesion masks went through a second

626 round of manual editing as needed, to ensure that the anatomical borders of the lesion  
627 were accurately represented on the template atlas. The Morel atlas was used determine  
628 the location of different thalamic nuclei (Krauth et al., 2010). This atlas identifies human  
629 thalamic nuclei based on cyto- and myelo-architecture information in stained slices  
630 from five postmortem human brains, and further transformed to the template space.

631  
632

### 633 *Functional connectivity and network hub analyses*

634

635 The normative functional connectome dataset consisted of resting-state fMRI data from  
636 235 subjects (mean age = 21.7 years, SD = 2.87 years, age range =19–27, 131 males). Data  
637 from these subjects were acquired as part of the Brain Genomics Superstruct Project  
638 (Holmes et al., 2015), which we have previously used to map the hub properties of the  
639 thalamus (Hwang et al., 2017). For each normative subject, two six-minute runs of fMRI  
640 data were collected using a gradient-echo echo-planar imaging sequence (repetition  
641 time [TR] = 3000 ms, echo time [TE] = 30 ms, flip angle = 85 degrees, 3 mm<sup>3</sup> isotropic  
642 voxels with 47 axial slices). We replicated our results using 62 subjects from an  
643 independent dataset from the Nathan Kline Institute-Rockland Sample (Nooner et al.,  
644 2012). For the replication dataset, nine minutes and 35 seconds of resting-state fMRI  
645 data were collected for each subject using with the following parameters: TR = 1400 ms,  
646 TE = 30 ms, multiband factor = 4, flip angle = 65 degrees, 2 mm<sup>3</sup> isotropic voxels with 64  
647 axial slices.

648

649 To prepare fMRI data for connectivity and network analyses, brain images were  
650 segmented into different tissue classes (white matter (WM), gray matter (GM), and  
651 cerebrospinal fluid (CSF)) using FSL's FAST software which helps co-registering  
652 functional and anatomical data using boundary-based registration algorithm. We used  
653 rigid body motion correction to correct for head motion. T1 data were then spatially  
654 normalized to the MNI-152 space using the same high-deformation, non-linear function  
655 from the Advanced Normalization Tools that we used to transform lesion masks into  
656 the MNI space. We performed anatomical CompCor nuisance regression to further  
657 reduce non-neural noise (Behzadi et al., 2007). The close physical proximity between the  
658 thalamus and high-noise regions, such as the ventricles, could result in blurring the



659 fMRI signal. To minimize this confound we further regressed out the mean signals from  
660 CSF, WM, and GM that were within five voxels (10 mm) from the thalamus.  
661 Importantly, no spatial smoothing was performed. After regression, data were  
662 bandpass filtered (0.009–0.08 Hz).

663  
664 Following preprocessing, mean resting state fMRI time-series were extracted from 400  
665 cortical ROIs (Schaefer et al., 2018) and concatenated across runs for subjects. To  
666 localize the thalamus, the Morel atlas (Krauth et al., 2010) was used to define its spatial  
667 extent (2227 2-mm<sup>3</sup> voxels included in the atlas, registered to the MNI template). We  
668 used Pearson correlation to estimate thalamocortical functional connectivity. Note that  
669 no correlations were calculated between thalamic voxels. This procedure resulted in a  
670 2227 (thalamus voxel) x 400 cortical ROI matrix. To estimate the connector hub property  
671 of each thalamus voxel, we calculated its participation coefficient value across a range  
672 of density thresholds of this thalamocortical matrix (density = 0.01–0.05), and averaged  
673 across thresholds. The PC value of thalamus voxel *i* is defined as:

$$674 \quad PC = 1 - \sum_{s=1}^{N_M} \left( \frac{K_{is}}{K_i} \right)^2,$$

675 where  $K_i$  is the sum of total functional connectivity weight for voxel *i*,  $K_{is}$  is the sum of  
676 functional connectivity weight between voxel *i* and the cortical network *s*, and  $N_M$  is  
677 the total number of networks. To perform this calculation, we assigned the 400 cortical  
678 ROIs to seven cortical functional networks including FP, DF, CO, DA, limbic, SM and  
679 visual networks (Schaefer et al., 2018; Yeo et al., 2011). If a thalamic voxel acts as a  
680 connector hub for cortical functional networks, it should exhibit functional connectivity  
681 uniformly distributed with cortical networks, and its PC value will be close to 1;  
682 otherwise, if its functional connectivity is concentrated within a specific cortical  
683 network, its PC value will be close to 0 (Gratton et al., 2012; Guimerà and Nunes  
684 Amaral, 2005).

685  
686 *Neurosynth meta-analyses*

687  
688 We used the Neurosynth database (Yarkoni et al., 2011) to identify brain regions  
689 associated with putative cognitive processes that are assessed by the TMT Part B, BNT,  
690 COWA, RAVLT delayed recall, and RAVLT delayed recognition tests. Neurosynth

691 performs automated meta-analyses on a large fMRI corpus, with more than 14000 fMRI  
692 studies included in the database. We queried the following terms, “executive” (for  
693 TMT Part B), “naming” (for BNT), “fluency” (for COWA), “recall” (for RAVLT delayed  
694 recall), and “recognition” (for RAVLT delayed recognition). Neurosynth then  
695 performed an association test for each term, to identify voxels more consistently  
696 reported in fMRI studies that contained the queried term than studies that didn’t  
697 contain the term. The resulting maps depicts putative brain systems whose activities are  
698 associated with the searched term.

699

#### 700 *Estimating the density of Matrix cells*

701

702 Procedures used to estimate the densities of matrix and core projection cells were  
703 previously published (Müller et al., 2020). Briefly, we obtained spatial maps (in MNI-  
704 152 space) of mRNA expression levels for PVALB and CALB1 proteins provided by the  
705 Allen Human Brain Atlas (Gryglewski et al., 2018). These proteins have been previously  
706 shown to delineate matrix and core thalamic projection cells (Jones and Hendry, 1989).  
707 Voxel-wise mRNA levels were first normalized and transformed into z-scores across all  
708 voxels within the thalamus, and the voxel-wise distributions of these normalized values  
709 were compared between lesion sites. A difference score was also calculated to identify  
710 thalamic voxels with higher densities of matrix cells.

711

712

713

714

715

#### 716 **Code and data availability statement**

717 Functional connectivity analyses utilized publicly available datasets (Holmes et al.,  
718 2015; Nooner et al., 2012). Code and de-identified neuropsychological assessment  
719 outcome data can be accessed at <https://github.com/kaihwang/LTH>.

720

721

722

723

724



725 **References**

726

- 727 Aggleton JP, O'Mara SM, Vann SD, Wright NF, Tsanov M, Erichsen JT. 2010.  
728 Hippocampal-anterior thalamic pathways for memory: uncovering a network of  
729 direct and indirect actions: Hippocampal-thalamic pathways for memory. *Eur J*  
730 *Neurosci* **31**:2292–2307.
- 731 Alexander GE, DeLong MR, Strick PL. 1986. Parallel organization of functionally  
732 segregated circuits linking basal ganglia and cortex. *Annu Rev Neurosci* **9**:357–381.
- 733 Assem M, Glasser MF, Van Essen DC, Duncan J. 2020. A Domain-General Cognitive  
734 Core Defined in Multimodally Parcellated Human Cortex. *Cereb Cortex*.  
735 doi:10.1093/cercor/bhaa023
- 736 Avants BB, Tustison N, Song G. 2009. Advanced normalization tools (ANTS). *Insight J*  
737 **2**:1–35.
- 738 Baldo JV, Arévalo A, Patterson JP, Dronkers NF. 2013. Grey and white matter correlates  
739 of picture naming: evidence from a voxel-based lesion analysis of the Boston  
740 Naming Test. *Cortex* **49**:658–667.
- 741 Barbas H, Henion TH, Dermon CR. 1991. Diverse thalamic projections to the prefrontal  
742 cortex in the rhesus monkey. *J Comp Neurol* **313**:65–94.
- 743 Behzadi Y, Restom K, Liao J, Liu TT. 2007. A component based noise correction method  
744 (CompCor) for BOLD and perfusion based fMRI. *Neuroimage* **37**:90–101.
- 745 Bertolero MA, Yeo BTT, Bassett DS, D'Esposito M. 2018. A mechanistic model of  
746 connector hubs, modularity and cognition. *Nat Hum Behav* **2**:765–777.
- 747 Bertolero MA, Yeo BTT, D'Esposito M. 2015. The modular and integrative functional  
748 architecture of the human brain. *Proc Natl Acad Sci U S A* **112**:E6798-807.
- 749 Bowie CR, Harvey PD. 2006. Administration and interpretation of the Trail Making  
750 Test. *Nat Protoc* **1**:2277–2281.
- 751 Bowren M Jr, Adolphs R, Bruss J, Manzel K, Corbetta M, Tranel D, Boes AD. 2020.  
752 Multivariate Lesion-Behavior Mapping of General Cognitive Ability and Its  
753 Psychometric Constituents. *J Neurosci* **40**:8924–8937.
- 754 Brett M, Leff AP, Rorden C, Ashburner J. 2001. Spatial normalization of brain images  
755 with focal lesions using cost function masking. *Neuroimage* **14**:486–500.
- 756 Cohen JR, D'Esposito M. 2016. The Segregation and Integration of Distinct Brain  
757 Networks and Their Relationship to Cognition. *J Neurosci* **36**:12083–12094.
- 758 Cole MW, Pathak S, Schneider W. 2010. Identifying the brain's most globally connected  
759 regions. *Neuroimage* **49**:3132–3148.
- 760 Cole MW, Reynolds JR, Power JD, Repovs G, Anticevic A, Braver TS. 2013. Multi-task  
761 connectivity reveals flexible hubs for adaptive task control. *Nat Neurosci* **16**:1348–  
762 1355.
- 763 Crossley NA, Mechelli A, Vértes PE, Winton-Brown TT, Patel AX, Ginestet CE, McGuire  
764 P, Bullmore ET. 2013. Cognitive relevance of the community structure of the  
765 human brain functional coactivation network. *Proc Natl Acad Sci U S A*  
766 **110**:11583–11588.
- 767 Crosson B, Parker JC, Kim AK, Warren RL, Kepes JJ, Tully R. 1986. A case of thalamic  
768 aphasia with postmortem verification. *Brain Lang* **29**:301–314.
- 769 Crowe SF. 1998. The differential contribution of mental tracking, cognitive flexibility,  
770 visual search, and motor speed to performance on parts A and B of the Trail  
771 Making Test. *J Clin Psychol* **54**:585–591.

- 772 de Bourbon-Teles J, Bentley P, Koshino S, Shah K, Dutta A, Malhotra P, Egner T, Husain  
773 M, Soto D. 2014. Thalamic control of human attention driven by memory and  
774 learning. *Curr Biol* **24**:993–999.
- 775 Dosenbach NUF, Fair DA, Cohen AL, Schlaggar BL, Petersen SE. 2008. A dual-networks  
776 architecture of top-down control. *Trends Cogn Sci* **12**:99–105.
- 777 Duncan J. 2010. The multiple-demand (MD) system of the primate brain: mental  
778 programs for intelligent behaviour. *Trends Cogn Sci* **14**:172–179.
- 779 Fastenau PS, Denburg NL, Hufford BJ. 1999. Adult norms for the Rey-Osterrieth  
780 Complex Figure Test and for supplemental recognition and matching trials from  
781 the Extended Complex Figure Test. *Clin Neuropsychol* **13**:30–47.
- 782 Giguere M, Goldman-Rakic PS. 1988. Mediodorsal nucleus: areal, laminar, and  
783 tangential distribution of afferents and efferents in the frontal lobe of rhesus  
784 monkeys. *J Comp Neurol* **277**:195–213.
- 785 Gläscher J, Adolphs R, Damasio H, Bechara A, Rudrauf D, Calamia M, Paul LK, Tranel  
786 D. 2012. Lesion mapping of cognitive control and value-based decision making in  
787 the prefrontal cortex. *Proceedings of the National Academy of Sciences* **109**:14681–  
788 14686.
- 789 Goldman-Rakic PS. 1988. Topography of cognition: parallel distributed networks in  
790 primate association cortex. *Annu Rev Neurosci* **11**:137–156.
- 791 Graff-Radford NR, Eslinger PJ, Damasio AR, Yamada T. 1984. Nonhemorrhagic  
792 infarction of the thalamus: behavioral, anatomic, and physiologic correlates.  
793 *Neurology* **34**:14–23.
- 794 Graff-Radford NR, Tranel D, Van Hoesen GW, Brandt JP. 1990. Diencephalic amnesia.  
795 *Brain* **113 ( Pt 1)**:1–25.
- 796 Gratton C, Nomura EM, Pérez F, D’Esposito M. 2012. Focal brain lesions to critical  
797 locations cause widespread disruption of the modular organization of the brain. *J*  
798 *Cogn Neurosci* **24**:1275–1285.
- 799 Gratton C, Sun H, Petersen SE. 2018. Control networks and hubs. *Psychophysiology* **55**.  
800 doi:10.1111/psyp.13032
- 801 Greene DJ, Marek S, Gordon EM, Siegel JS, Gratton C, Laumann TO, Gilmore AW, Berg  
802 JJ, Nguyen AL, Dierker D, Van AN, Ortega M, Newbold DJ, Hampton JM,  
803 Nielsen AN, McDermott KB, Roland JL, Norris SA, Nelson SM, Snyder AZ,  
804 Schlaggar BL, Petersen SE, Dosenbach NUF. 2020. Integrative and Network-  
805 Specific Connectivity of the Basal Ganglia and Thalamus Defined in Individuals.  
806 *Neuron* **105**:742-758.e6.
- 807 Gryglewski G, Seiger R, James GM, Godbersen GM, Komorowski A, Unterholzner J,  
808 Michenthaler P, Hahn A, Wadsak W, Mitterhauser M, Kasper S, Lanzenberger R.  
809 2018. Spatial analysis and high resolution mapping of the human whole-brain  
810 transcriptome for integrative analysis in neuroimaging. *Neuroimage* **176**:259–267.
- 811 Guillery RW, Sherman SM. 2002. Thalamic relay functions and their role in  
812 corticocortical communication: generalizations from the visual system. *Neuron*  
813 **33**:163–175.
- 814 Guimerà R, Nunes Amaral LA. 2005. Functional cartography of complex metabolic  
815 networks. *Nature* **433**:895–900.
- 816 Hagmann P, Cammoun L, Gigandet X, Meuli R, Honey CJ, Wedeen VJ, Sporns O. 2008.  
817 Mapping the structural core of human cerebral cortex. *PLoS Biol* **6**:e159.
- 818 Holmes AJ, Hollinshead MO, O’Keefe TM, Petrov VI, Fariello GR, Wald LL, Fischl B,  
819 Rosen BR, Mair RW, Roffman JL, Smoller JW, Buckner RL. 2015. Brain Genomics

- 820 Superstruct Project initial data release with structural, functional, and behavioral  
821 measures. *Sci Data* **2**:150031.
- 822 Hwang K, Bertolero MA, Liu WB, D'esposito M. 2017. The human thalamus is an  
823 integrative hub for functional brain networks. *Journal of Neuroscience* **37**:5594–  
824 5607.
- 825 Hwang K, Bruss J, Tranel D, Boes AD. 2020. Network Localization of Executive  
826 Function Deficits in Patients with Focal Thalamic Lesions. *J Cogn Neurosci*  
827 **32**:2303–2319.
- 828 Jones EG. 2009. Synchrony in the interconnected circuitry of the thalamus and cerebral  
829 cortex. *Ann N Y Acad Sci* **1157**:10–23.
- 830 Jones EG. 2001. The thalamic matrix and thalamocortical synchrony. *Trends Neurosci*  
831 **24**:595–601.
- 832 Jones EG, Hendry SHC. 1989. Differential Calcium Binding Protein Immunoreactivity  
833 Distinguishes Classes of Relay Neurons in Monkey Thalamic Nuclei. *Eur J*  
834 *Neurosci* **1**:222–246.
- 835 Kortte KB, Horner MD, Windham WK. 2002. The trail making test, part B: cognitive  
836 flexibility or ability to maintain set? *Appl Neuropsychol* **9**:106–109.
- 837 Krauth A, Blanc R, Poveda A, Jeanmonod D, Morel A, Székely G. 2010. A mean three-  
838 dimensional atlas of the human thalamus: generation from multiple histological  
839 data. *Neuroimage* **49**:2053–2062.
- 840 Lezak MD, Howieson DB, Bigler ED, Tranel D. 2012. Neuropsychological assessment.  
841 New York, USA: Oxford University Press.
- 842 Liebermann D, Ploner CJ, Kraft A, Kopp UA, Ostendorf F. 2013. A dysexecutive  
843 syndrome of the medial thalamus. *Cortex* **49**:40–49.
- 844 Meunier D, Lambiotte R, Bullmore ET. 2010. Modular and hierarchically modular  
845 organization of brain networks. *Front Neurosci* **4**:200.
- 846 Meyers JE, Meyers KR. 1995. Rey complex figure test under four different  
847 administration procedures. *Clin Neuropsychol* **9**:63–67.
- 848 Müller EJ, Munn B, Hearne LJ, Smith JB, Fulcher B, Arnatkevičiūtė A, Lurie DJ, Cocchi  
849 L, Shine JM. 2020. Core and matrix thalamic sub-populations relate to spatio-  
850 temporal cortical connectivity gradients. *Neuroimage* **222**:117224.
- 851 Nachev P, Coulthard E, Jäger HR, Kennard C, Husain M. 2008. Enantiomorphic  
852 normalization of focally lesioned brains. *Neuroimage* **39**:1215–1226.
- 853 Nooner KB, Colcombe SJ, Tobe RH, Mennes M, Benedict MM, Moreno AL, Panek LJ,  
854 Brown S, Zavitz ST, Li Q, Sikka S, Gutman D, Bangaru S, Schlachter RT, Kamiel  
855 SM, Anwar AR, Hinz CM, Kaplan MS, Rachlin AB, Adelsberg S, Cheung B,  
856 Khanuja R, Yan C, Craddock CC, Calhoun V, Courtney W, King M, Wood D, Cox  
857 CL, Kelly AMC, Di Martino A, Petkova E, Reiss PT, Duan N, Thomsen D, Biswal  
858 B, Coffey B, Hoptman MJ, Javitt DC, Pomara N, Sidtis JJ, Koplewicz HS,  
859 Castellanos FX, Leventhal BL, Milham MP. 2012. The NKI-Rockland Sample: A  
860 Model for Accelerating the Pace of Discovery Science in Psychiatry. *Front*  
861 *Neurosci* **6**:152.
- 862 Pergola G, Danet L, Barbeau EJ, Eustache P, Planton M, Raposo N, Sibon I, Albucher J-F,  
863 Bonneville F, Peran P, Pariente J. 2016. Thalamic amnesia after infarct: The role of  
864 the mammillothalamic tract and mediodorsal nucleus. *Neurology*.
- 865 Power JD, Schlaggar BL, Lessov-Schlaggar CN, Petersen SE. 2013. Evidence for hubs in  
866 human functional brain networks. *Neuron* **79**:798–813.

- 867 Reber J, Hwang K, Bowren M, Bruss J, Mukherjee P, Tranel D, Boes AD. 2021. Cognitive  
868 impairment after focal brain lesions is better predicted by damage to structural  
869 than functional network hubs. *Proceedings of the National Academy of Sciences*.  
870 Ruff RM, Light RH, Parker SB, Levin HS. 1996. Benton Controlled Oral Word  
871 Association Test: reliability and updated norms. *Arch Clin Neuropsychol* **11**:329–  
872 338.
- 873 Schaefer A, Kong R, Gordon EM, Laumann TO, Zuo X-N, Holmes AJ, Eickhoff SB, Yeo  
874 BTT. 2018. Local-Global Parcellation of the Human Cerebral Cortex from  
875 Intrinsic Functional Connectivity MRI. *Cereb Cortex* **28**:3095–3114.
- 876 Selemon LD, Goldman-Rakic PS. 1988. Common cortical and subcortical targets of the  
877 dorsolateral prefrontal and posterior parietal cortices in the rhesus monkey:  
878 evidence for a distributed neural network subserving spatially guided behavior.  
879 *Journal of Neuroscience* **8**:4049–4068.
- 880 Sherman SM, Guillery RW. 2013. Functional Connections of Cortical Areas: A New  
881 View from the Thalamus. MIT Press.
- 882 Shine JM, Bissett PG, Bell PT, Koyejo O, Balsters JH, Gorgolewski KJ, Moodie CA,  
883 Poldrack RA. 2016. The Dynamics of Functional Brain Networks: Integrated  
884 Network States during Cognitive Task Performance. *Neuron* **92**:544–554.
- 885 Snow JC, Allen HA, Rafal RD, Humphreys GW. 2009. Impaired attentional selection  
886 following lesions to human pulvinar: evidence for homology between human  
887 and monkey. *Proc Natl Acad Sci U S A* **106**:4054–4059.
- 888 Sporns O, Betzel RF. 2016. Modular Brain Networks. *Annu Rev Psychol* **67**:613–640.
- 889 Sutterer MJ, Tranel D. 2017. Neuropsychology and cognitive neuroscience in the fMRI  
890 era: A recapitulation of localizationist and connectionist views. *Neuropsychology*  
891 **31**:972–980.
- 892 Tombaugh TN, Hubble AM. 1997. The 60-item Boston Naming Test: norms for  
893 cognitively intact adults aged 25 to 88 years. *J Clin Exp Neuropsychol* **19**:922–932.
- 894 Vakil E, Blachstein H. 1993. Rey Auditory-Verbal Learning Test: structure analysis. *J*  
895 *Clin Psychol* **49**:883–890.
- 896 van den Heuvel MP, Sporns O. 2013. Network hubs in the human brain. *Trends Cogn Sci*  
897 **17**:683–696.
- 898 von Cramon DY, Hebel N, Schuri U. 1985. A contribution to the anatomical basis of  
899 thalamic amnesia. *Brain* **108 ( Pt 4)**:993–1008.
- 900 Von Monakow C. 1911. Localization of brain functions. *Z Psychol Neurol* **17**:185–200.
- 901 Warren DE, Power JD, Bruss J, Denburg NL, Waldron EJ, Sun H, Petersen SE, Tranel D.  
902 2014. Network measures predict neuropsychological outcome after brain injury.  
903 *Proc Natl Acad Sci U S A* **111**:14247–14252.
- 904 Yarkoni T, Poldrack RA, Nichols TE, Van Essen DC, Wager TD. 2011. Large-scale  
905 automated synthesis of human functional neuroimaging data. *Nat Methods* **8**:665–  
906 670.
- 907 Yeo BTT, Krienen FM, Eickhoff SB, Yaakub SN, Fox PT, Buckner RL, Asplund CL, Chee  
908 MWL. 2015. Functional Specialization and Flexibility in Human Association  
909 Cortex. *Cereb Cortex* **25**:3654–3672.
- 910 Yeo BTT, Krienen FM, Sepulcre J, Sabuncu MR, Lashkari D, Hollinshead M, Roffman JL,  
911 Smoller JW, Zöllei L, Polimeni JR, Fischl B, Liu H, Buckner RL. 2011. The  
912 organization of the human cerebral cortex estimated by intrinsic functional  
913 connectivity. *J Neurophysiol* **106**:1125–1165.
- 914



## 915 Supplementary Info

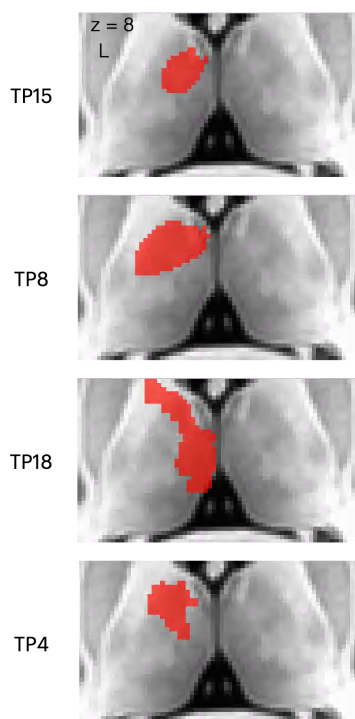

Supplementary Figure 1. Lesion sites of four example patients' that exhibited behavioral impairments ( $Z < -1.645$ ) on 2 or more cognitive domains. Patient TP15 and TP4 had impairment on executive, language, and memory functions. TP8 and TP18 had impairment on language and memory functions.

916

917

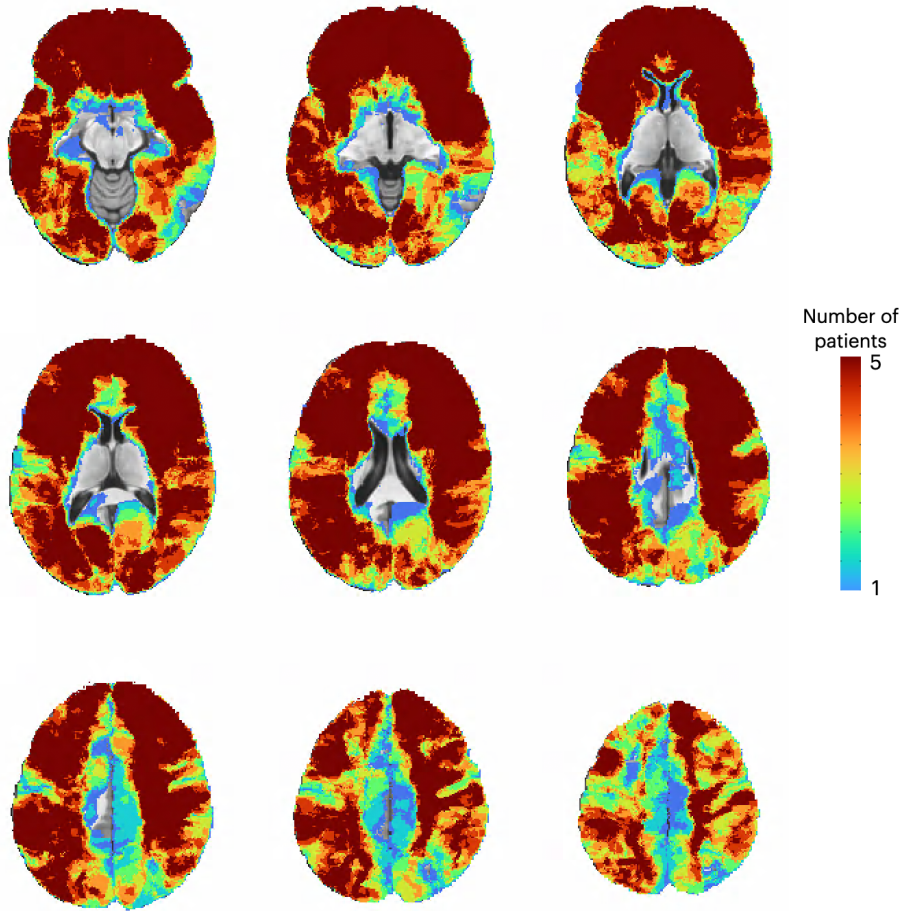

918

Supplementary Figure 2. Lesion sites 348 comparison patients.
